# Supplementary material for: Sedentary Behaviors and Physical Activity of Italian Undergraduate Students during Lockdown at the Time of CoViD−19 Pandemic
Source: PubMed Central journal article supplement (PMC7504707; doi:10.3390/ijerph17176171), 2020-08-25
Supplement: ijerph-17-06171-s001.pdf [file ijerph-17-06171-s001.pdf]

**Supplementary Table 1.** Results of the logistic regression model built on the achievement of recommended PA levels during lockdown as the outcome.

| Independent Variable                         | Achieving recommended PA level<br>OR (CI95%) |
|----------------------------------------------|----------------------------------------------|
| Age                                          |                                              |
| ≤ 21 years                                   | <i>Reference</i>                             |
| ≥ 22 years                                   | 0.78 (0.61–0.98)*                            |
| Gender                                       |                                              |
| Male                                         | <i>Reference</i>                             |
| Female                                       | 1.30 (1.01–1.65)*                            |
| University                                   |                                              |
| Bari                                         | <i>Reference</i>                             |
| Naples                                       | 1.97 (1.45–2.67)**                           |
| Rome                                         | 1.68 (1.09–2.61)*                            |
| Parents' educational level                   |                                              |
| Not graduated                                | <i>Reference</i>                             |
| Graduated                                    | 1.31 (1.03–1.68)*                            |
| Previous BMI                                 |                                              |
| Under/Normal weight                          | <i>Reference</i>                             |
| Overweight/Obese                             | 1.03 (0.78–1.36)                             |
| Previous achievement of recommended PA level |                                              |
| No                                           | <i>Reference</i>                             |
| Yes                                          | 4.53 (3.59–5.72)**                           |

OR (CI95%): Odds Ratio (95% Confidence Interval); \* $p < 0.05$ ; \*\*  $p < 0.01$ .
